# Supplementary material for: Influencing the froth flotation of LiAlO2 and melilite solid solution with ionic liquids
Source: Royal Society of Chemistry journal article supplement (doi:10.1039/d2ra02922g), 2022-01-01
Supplement: d2ra02922g1.pdf [file d2ra02922g1.pdf]

## Electronic Supplementary Information

### Influencing the Froth Flotation of $\text{LiAlO}_2$ and Melilite Solid Solution with Ionic Liquids

Hao Qiu,<sup>a</sup> Christin Degenhardt,<sup>a</sup> Niklas Feuge,<sup>b</sup> Daniel Goldmann <sup>\*a</sup> and René Wilhelm<sup>\*b</sup>

<sup>a</sup> Institute of Mineral and Waste Processing, Recycling and Circular Economy Systems, Clausthal University of Technology, Walther-Nernst-Str. 9, 38678 Clausthal-Zellerfeld, Germany; daniel.goldmann@tu-clausthal.de

<sup>b</sup> Institute of Organic Chemistry at the Clausthal University of Technology, Leibnizstrasse 6, 38678 Clausthal-Zellerfeld, Germany; rene.wilhelm@tu-clausthal.de

### XRD analysis of the ore sample

Figure S1 diffraction patterns of the minerals

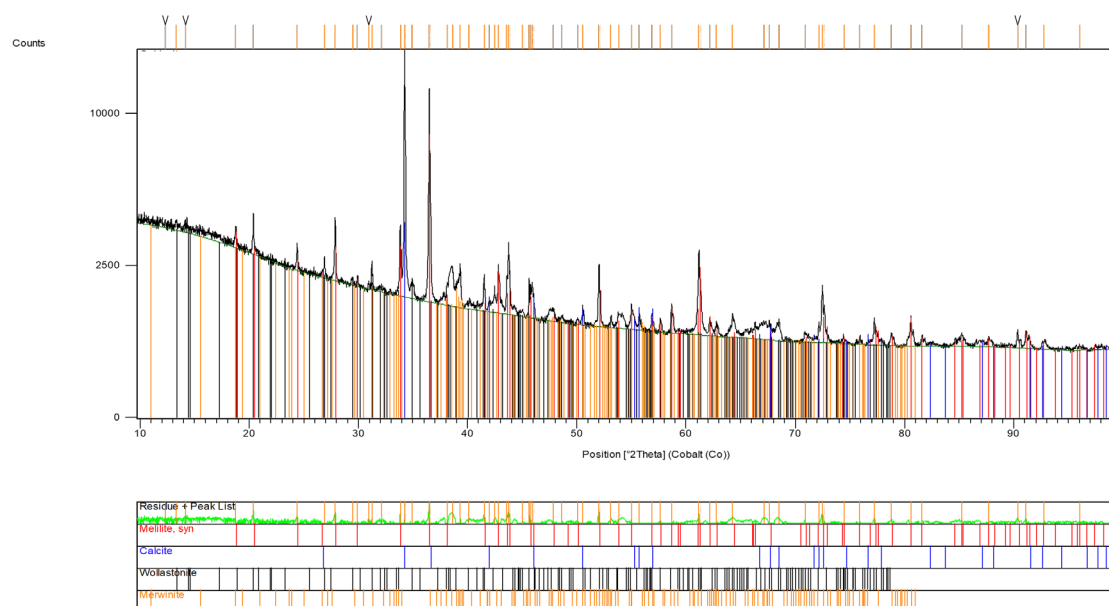

## FTIR Analysis

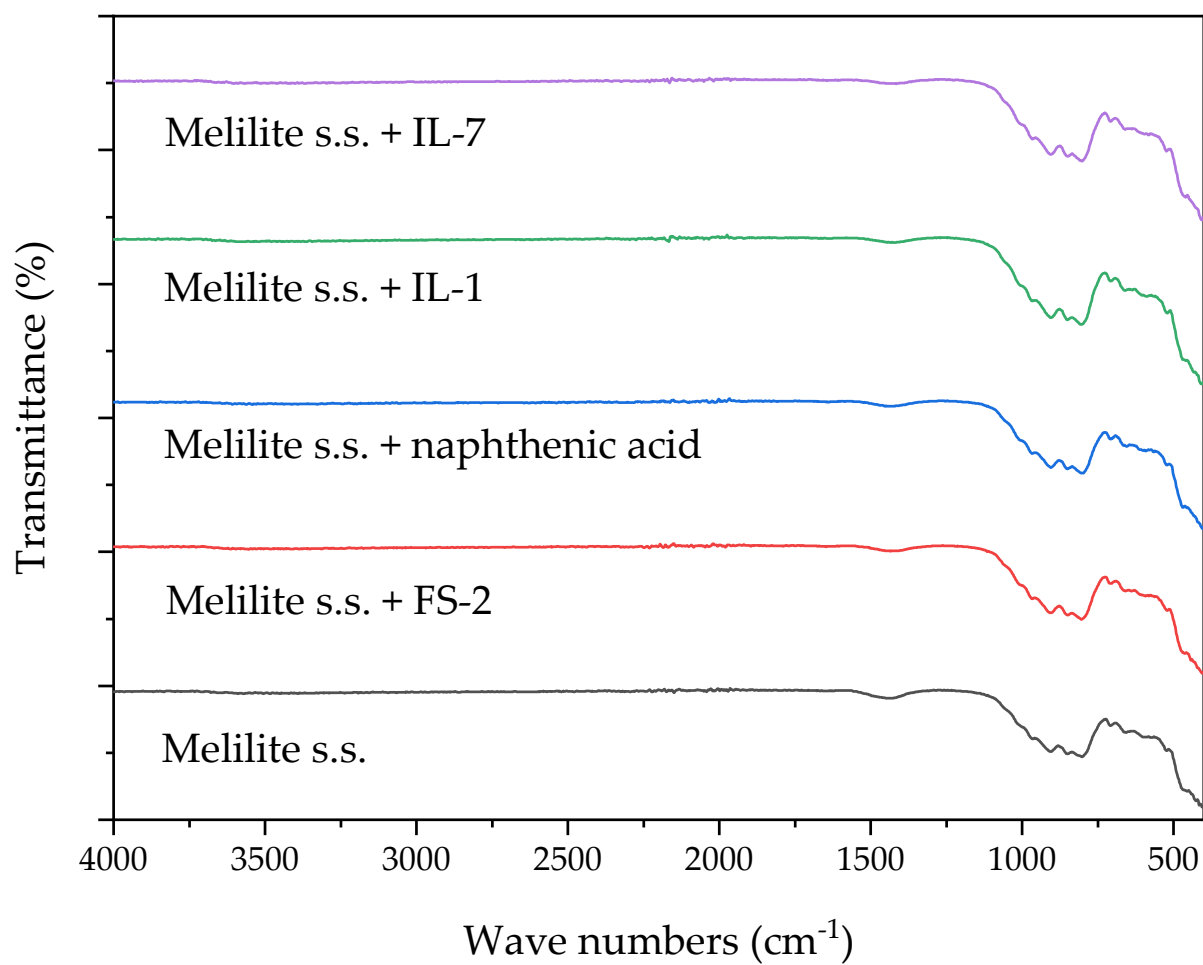

**Figure S2.** FT-IR measurement of melilite s.s. and melilite s.s. treated with different collectors at natural pH

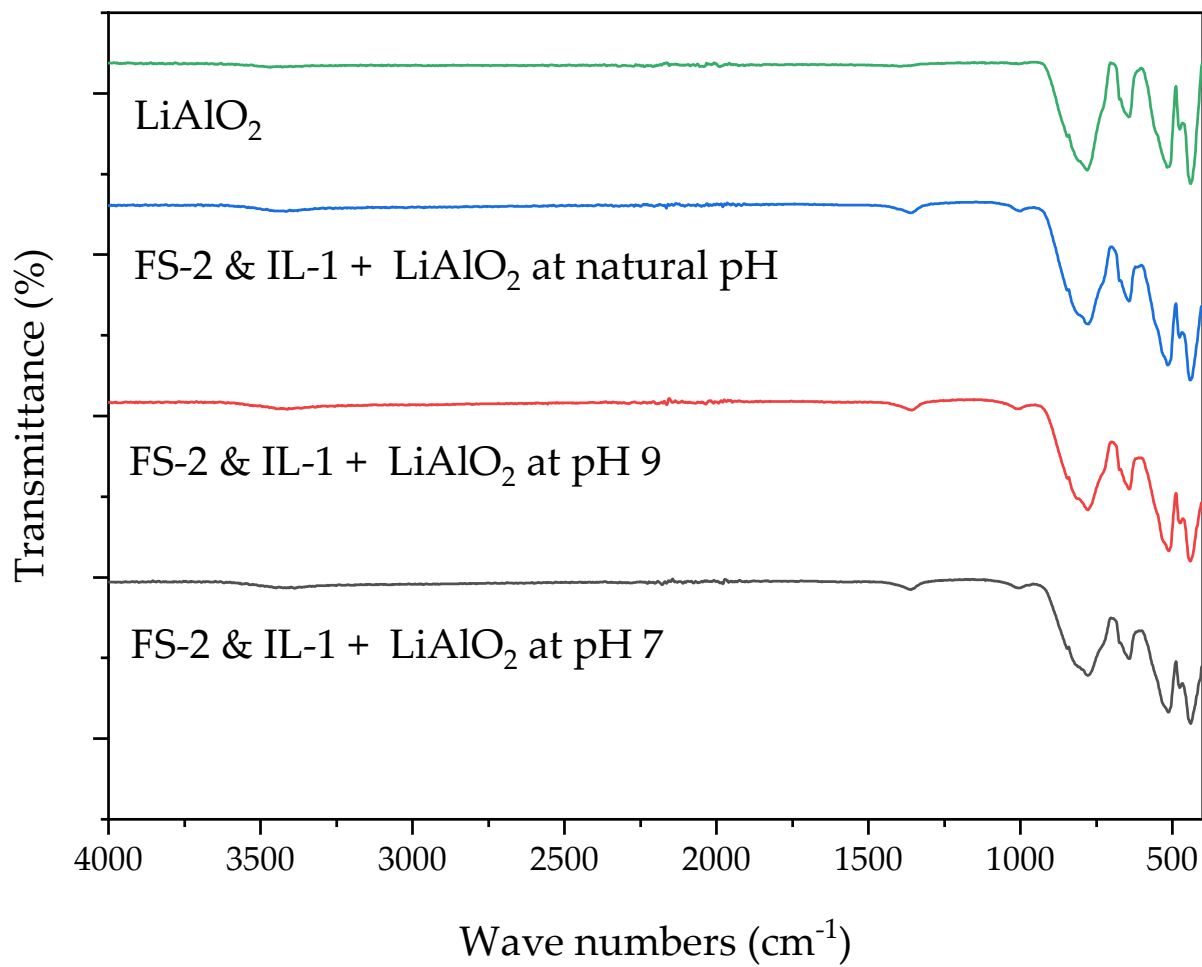

**Figure S3.** FT-IR measurement of LiAlO<sub>2</sub> and LiAlO<sub>2</sub> with mixed collector – FS-2 and IL- 1 at different pH

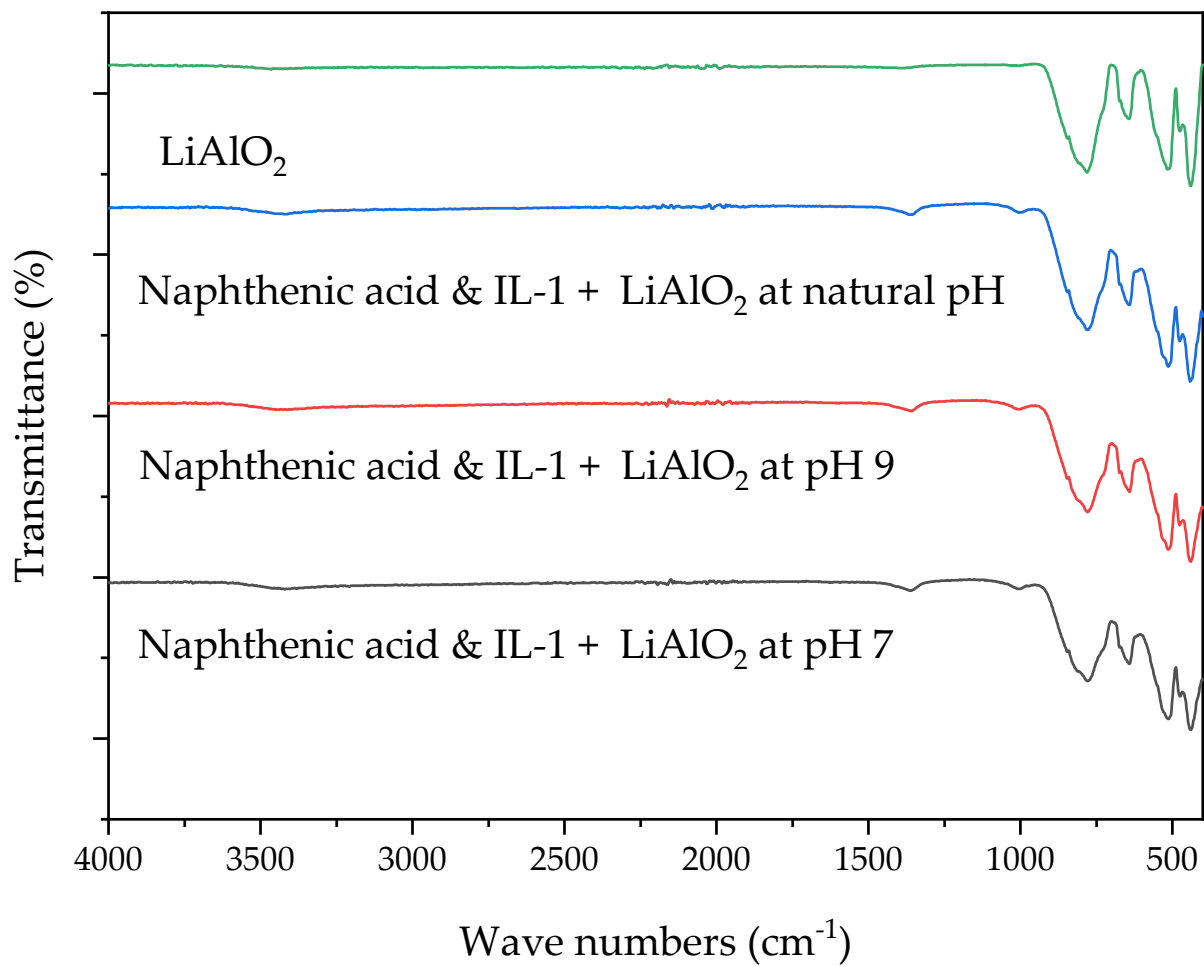

**Figure S4.** FT-IR measurement of  $\text{LiAlO}_2$  and  $\text{LiAlO}_2$  with mixed collector – Naphthenic acid and IL- 1 at different pH

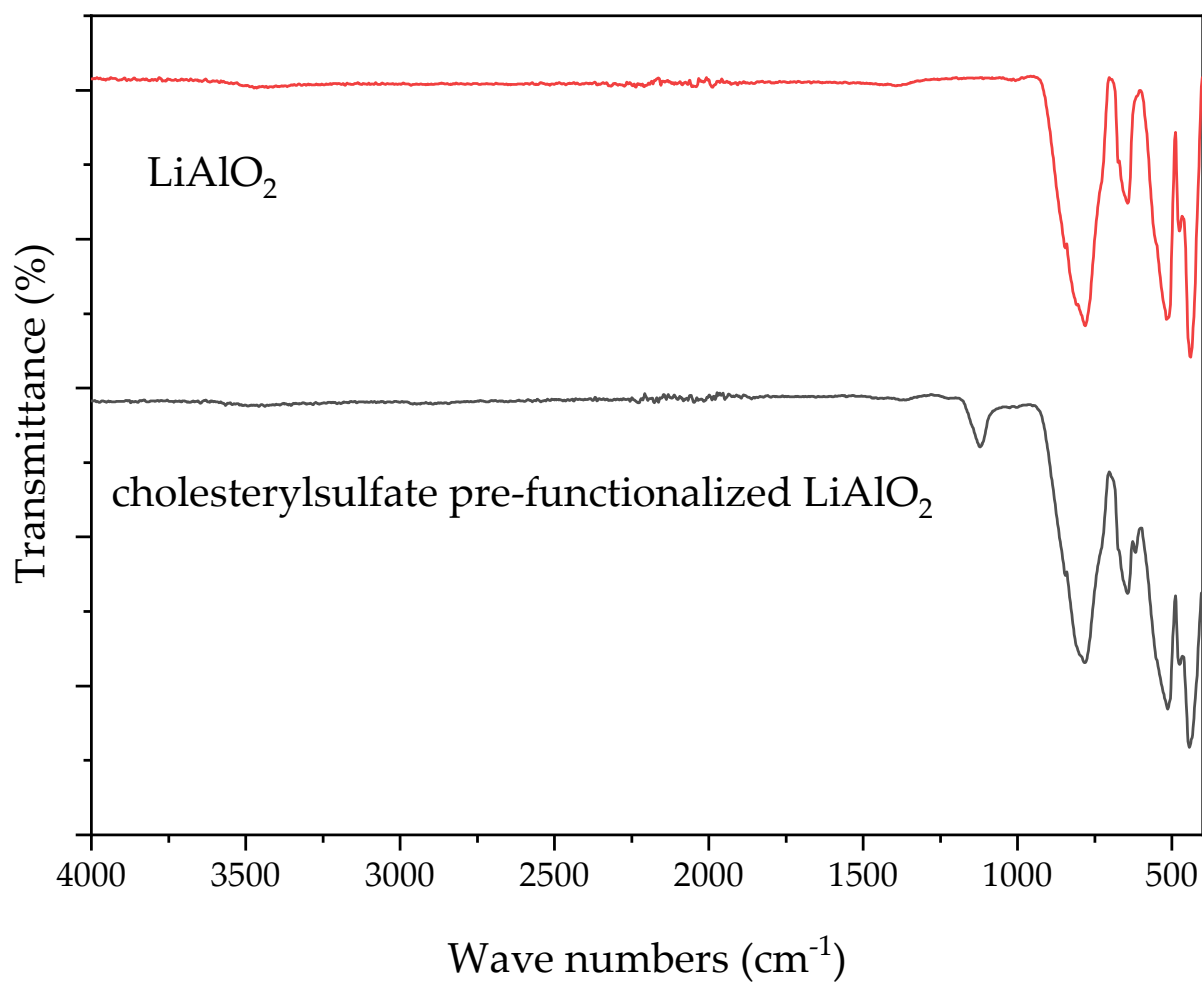

**Figure S5.** FT-IR measurement of LiAlO<sub>2</sub> and cholesteryl sulfate pre-functionalized LiAlO<sub>2</sub>

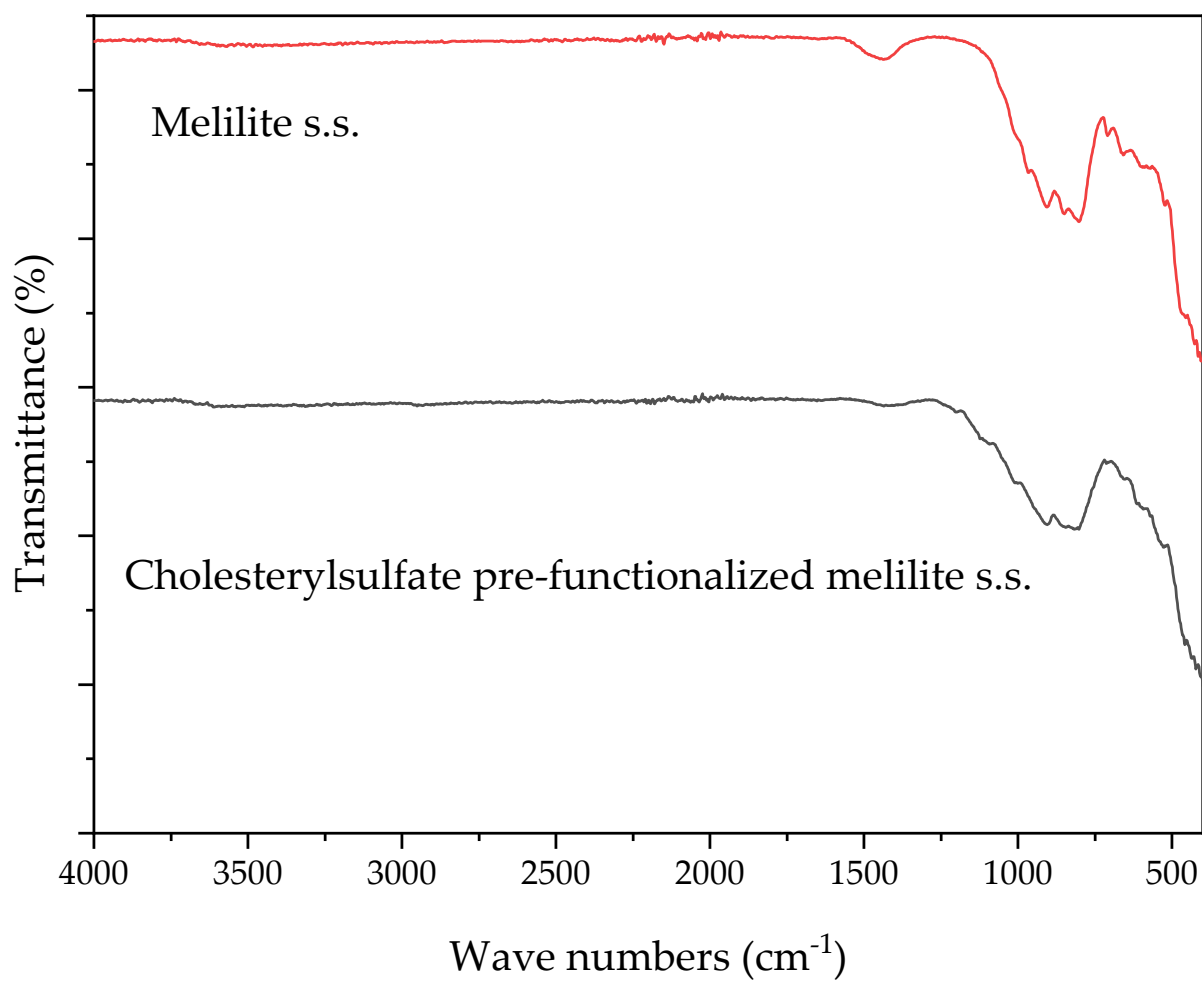

**Figure S6.** FT-IR measurement of melilite s.s. and cholesterylsulfate pre-functionalized melilite s.s.
